# Supplementary material for: Characterization and Functional Study of FAM49B Reveals Its Effect on Cell Proliferation in HEK293T Cells
Source: MDPI journal article supplement (doi:10.3390/genes13020388), 2022-02-21

EnrichmentRatio: Sample\_number/Background\_number

0.00 0.02 0.04 0.06 0.08 0.10 0.12

KEGG Pathway Class:  
EIP: Environmental Information Processing  
GIP: Genetic Information Processing  
CP : Cellular Processes  
OS : Organismal Systems  
M : Metabolism

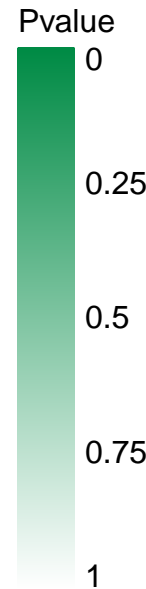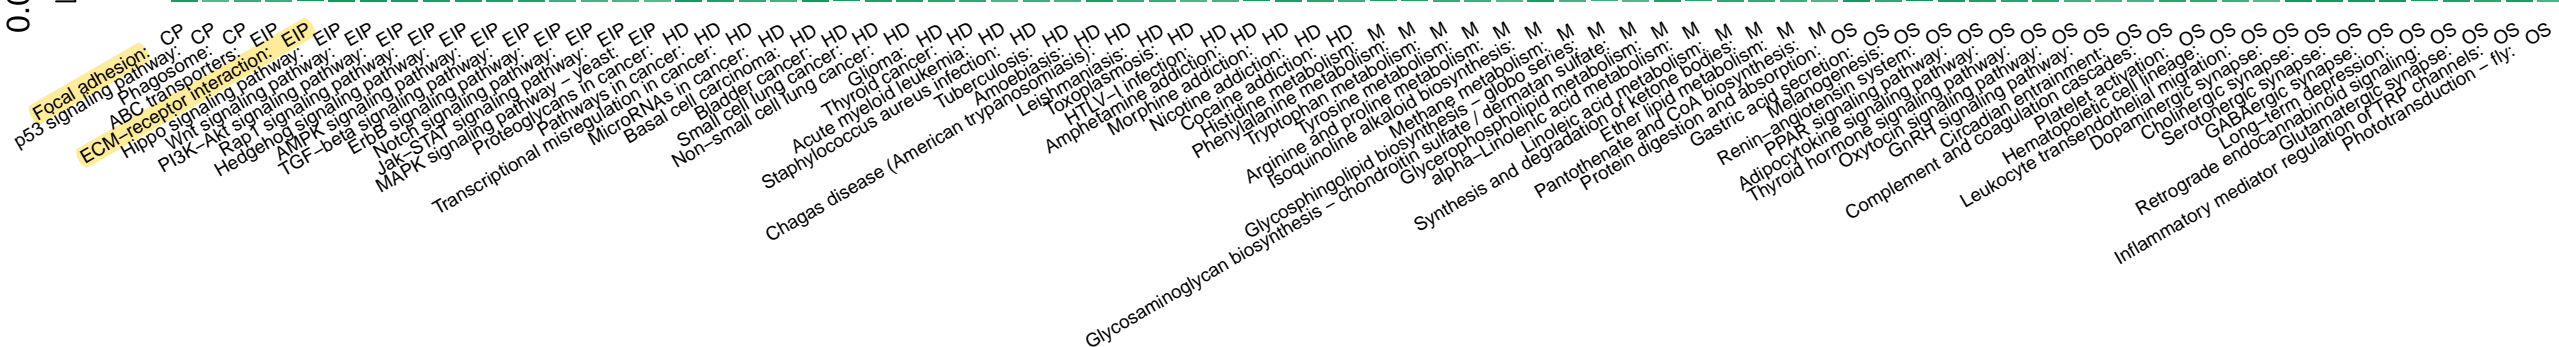

Supplement: s1 [file s1]
